# Supplementary material
Source: PubMed Central journal article supplement (PMC4201619)
Supplement: prio-7-501-s01.pdf [file prio-7-501-s01.pdf]

## Supplemental Material to:

Martin Paucar, Fengqing Xiang, Richard Moore, Ruth Walker, Elisabeth Winnberg, Per Svenningsson

Genotype-phenotype analysis in inherited prion disease with 8 octapeptide repeat insertional mutation

Prion 2013; 7(6)

<http://dx.doi.org/10.4161/pri.27260>

<https://www.landesbioscience.com/journals/prion/article/27180/>

Video S1:

<http://www.landesbioscience.com/admin/article/27260/2013PRION0061R1-VideoS1.wmv>

**Video S1.** The subject was examined and videotaped at the age of 34.

**Video segment 1** shows the subject with severe dementia, aphasia, aggressive behaviour, repetitive stereotyped movements (hand-wringing and foot-stamping) and disinhibition.

**Video segment 2** shows motor features with a parkinsonian gait (either induced or aggravated by neuroleptics), mild antecollis, head tilt, and difficulties when climbing stairs.
